# Supplementary material
Source: Royal Society of Chemistry journal article supplement (doi:10.1039/d6cy00268d)
Supplement: d6cy00268d1.pdf [file d6cy00268d1.pdf]

**Engineering Spatial and Electrostatic Confinement in Zeolites for Enhanced Low-Temperature NO Oxidation**

Guang-Wei Ma <sup>a,b</sup>, Qi Chen <sup>a</sup>, Sai Zhang <sup>a</sup>, Yuan-Hang Qin <sup>a, \*</sup>, Zhen Chen <sup>a, \*</sup>, Li Yang <sup>a</sup>, Cun-Wen Wang <sup>a, \*</sup>

<sup>a</sup> Key Laboratory for Green Chemical Process of Ministry of Education, Hubei Key Lab of Novel Reaction & Green Chemical Technology, School of Chemical Engineering and Pharmacy, Wuhan Institute of Technology, Wuhan 430205, China.

<sup>b</sup> Shanghai Saint Chemical Materials Co., Ltd., Shanghai 201315, China.

\*Corresponding author. Tel & Fax: +86-27-87194882. E-mail: qyhsir@qq.com, yhqin@wit.edu.cn (Y.-H. Qin); zhende\_888@126.com (Z. Chen); wangcw0120@163.com (C.-W. Wang).

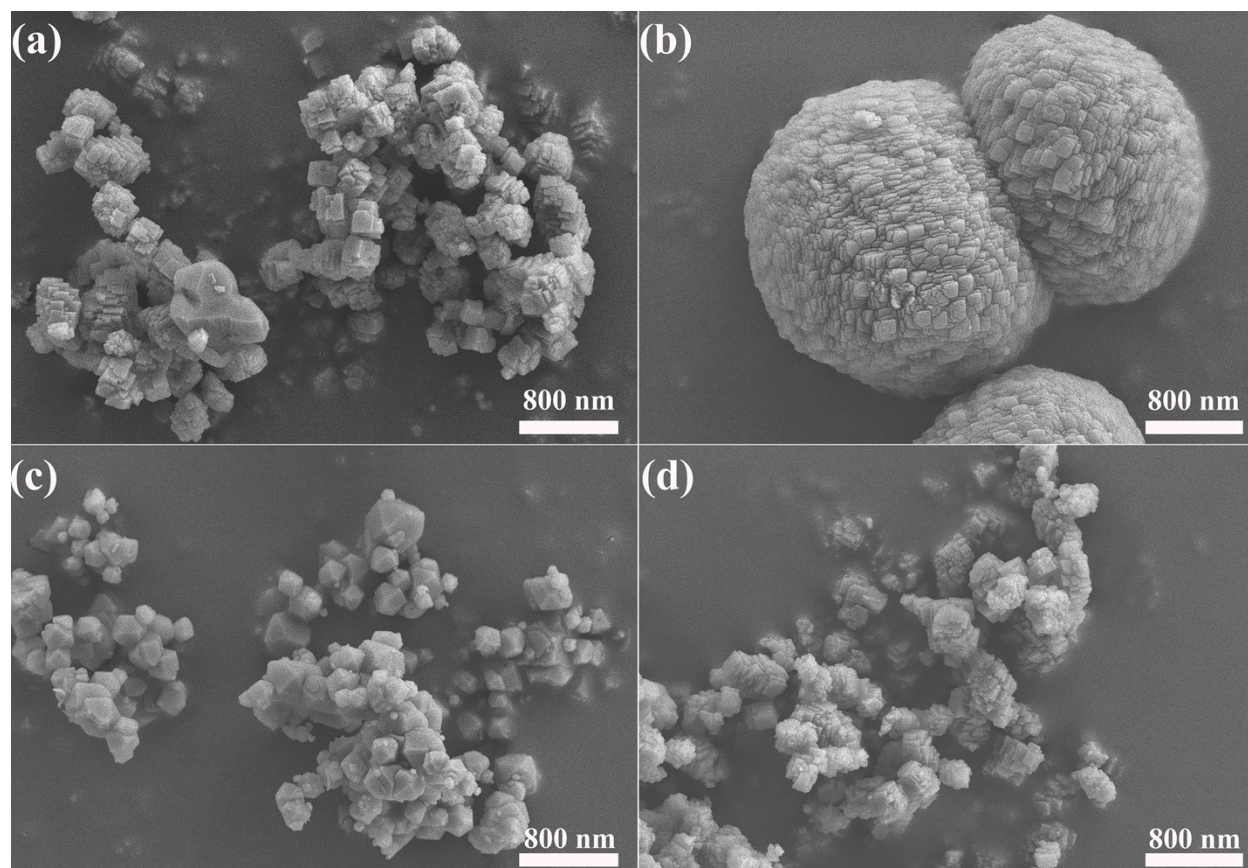

**Fig. S1.** FESEM images of SSZ-13-5 (a), SSZ-13-8 (b), SSZ-13-19 (c) and SSZ-13-73 (d).

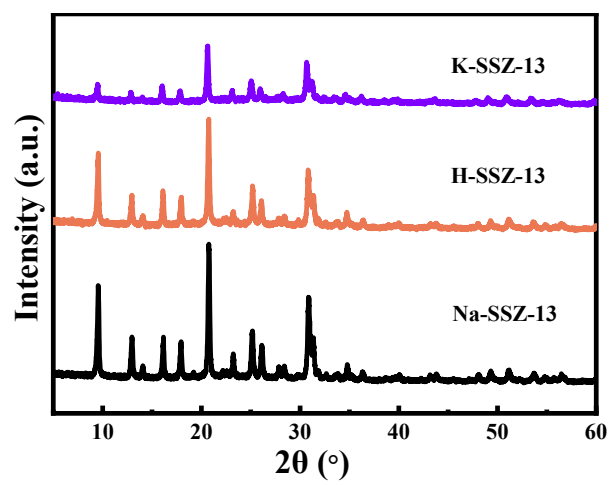

**Fig. S2.** XRD patterns of Na-SSZ-13, H-SSZ-13 and K-SSZ-13.

**Table S1.** Textural properties of ion-exchanged SSZ-13-8 zeolites.

| Zeolite     | Total surface area<br>(m <sup>2</sup> ·g <sup>-1</sup> ) | Micropore surface area<br>(m <sup>2</sup> ·g <sup>-1</sup> ) | Total pore volume<br>(cm <sup>3</sup> ·g <sup>-1</sup> ) | Micropore volume<br>(cm <sup>3</sup> ·g <sup>-1</sup> ) |
|-------------|----------------------------------------------------------|--------------------------------------------------------------|----------------------------------------------------------|---------------------------------------------------------|
| Na-SSZ-13-8 | 636                                                      | 480                                                          | 0.439                                                    | 0.194                                                   |
| H-SSZ-13-8  | 740                                                      | 533                                                          | 0.463                                                    | 0.225                                                   |
| K-SSZ-13-8  | 542                                                      | 361                                                          | 0.412                                                    | 0.156                                                   |
